# Supplementary material for: Actin-microtubule interplay coordinates spindle assembly in human oocytes
Source: PubMed Central journal article supplement (PMC6789129; doi:10.1038/s41467-019-12674-9), 2019-10-11
Supplement: 41467_2019_12674_MOESM1_ESM.pdf [file 41467_2019_12674_MOESM1_ESM.pdf]

Supplementary Information

**Actin-microtubule interplay coordinates spindle assembly in  
human oocytes**

Roeles and Tsiavaliaris

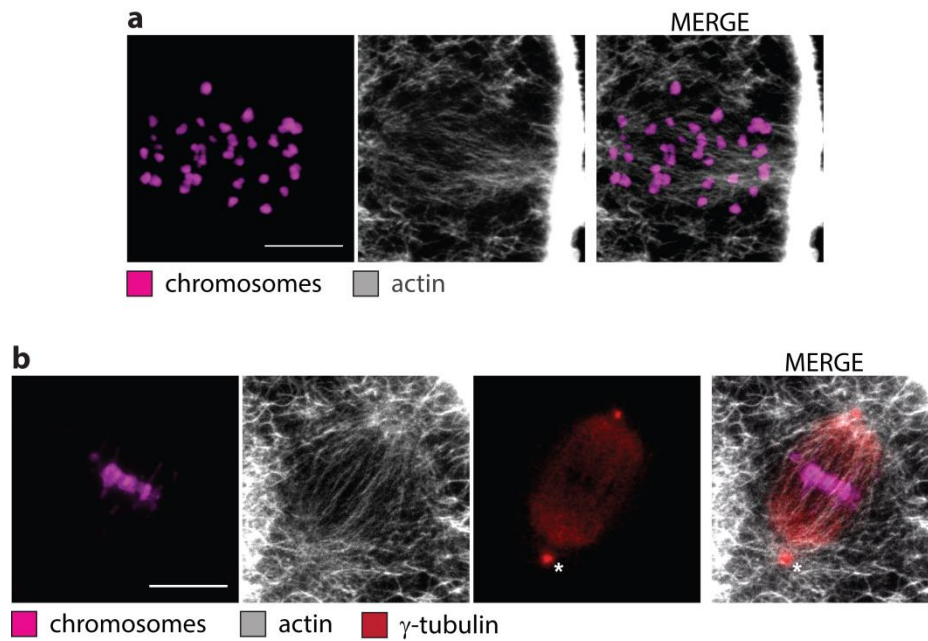

**Supplementary Fig. 1** Actin pervades the spindle of oocytes with abnormal chromosome number and associates with microtubules surrounding sperm DNA. **a**, Representative z-projection of a diploid metaphase II oocyte stained for chromosomes (Hoechst) and actin (phalloidin); z = 25 sections. **b**, Immunofluorescence staining of  $\gamma$ -tubulin together with chromosomes (Hoechst) and actin (phalloidin) at a spindle structure surrounding the sperm DNA in an ICSI treated oocyte. Asterisk marks sperm centrosome; z = 13 sections. Scale bars, 10  $\mu$ m.

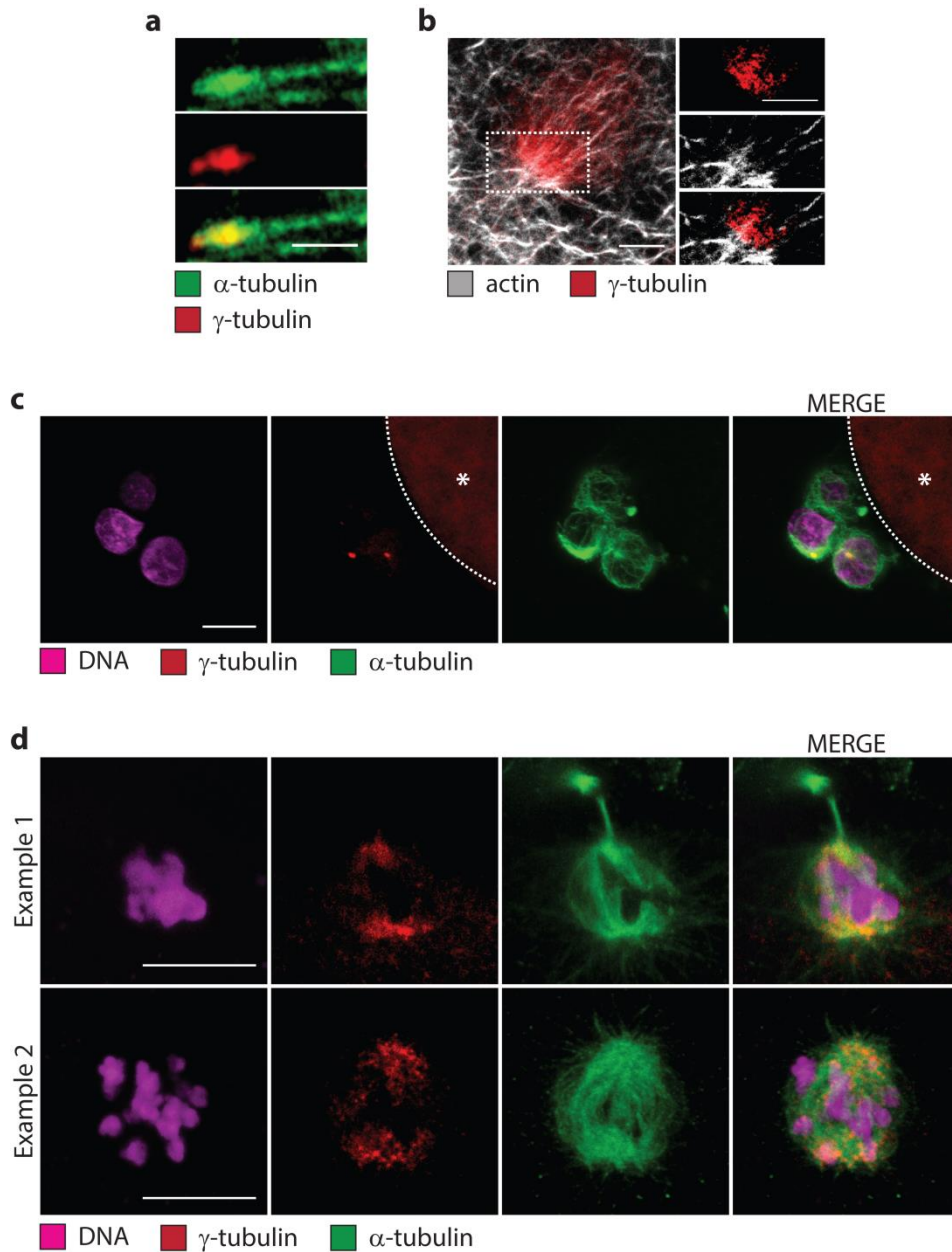

**Supplementary Fig. 2** Characterization of  $\gamma$ -tubulin distribution in human oocytes. **a**, Immunofluorescence image showing microtubules ( $\alpha$ -tubulin) and  $\gamma$ -tubulin. Scale bar, 2  $\mu$ m. **b**, Pole region of a metaphase II oocyte showing  $\gamma$ -tubulin and actin (phalloidin);  $z = 7$  sections. Scale bar, 5  $\mu$ m. **c**, Distribution of  $\gamma$ -tubulin in oocyte cytoplasm and cumulus cells. Immunofluorescence staining shows DNA (Hoechst), microtubules ( $\alpha$ -tubulin) and  $\gamma$ -tubulin. Asterisk marks oocyte;  $z = 15$  sections. Scale bar, 10  $\mu$ m. **d**, Immunofluorescence projections showing chromosomes (Hoechst), microtubules ( $\alpha$ -tubulin) and  $\gamma$ -tubulin in oocytes at early meiosis II;  $z = 11$  sections. Scale bars, 10  $\mu$ m.

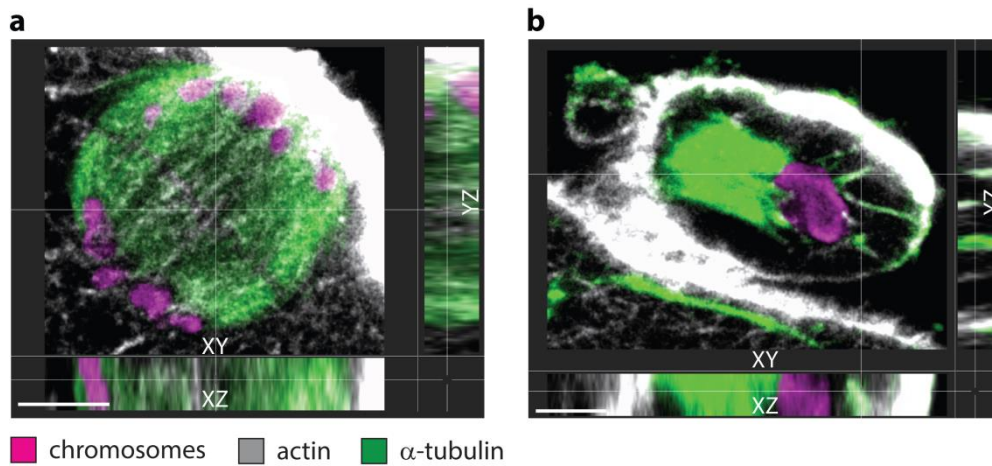

**Supplementary Fig. 3** Actin and microtubules adopt distinct and overlapping distribution patterns. **a** and **b**, Orthogonal sections showing chromosomes (Hoechst), actin (phalloidin) and microtubules ( $\alpha$ -tubulin) inside the centre volume of anaphase I (**a**) and telophase I (**b**) spindles. Depth ( $z$ ) = 3  $\mu\text{m}$ . Scale bars, 10  $\mu\text{m}$ .

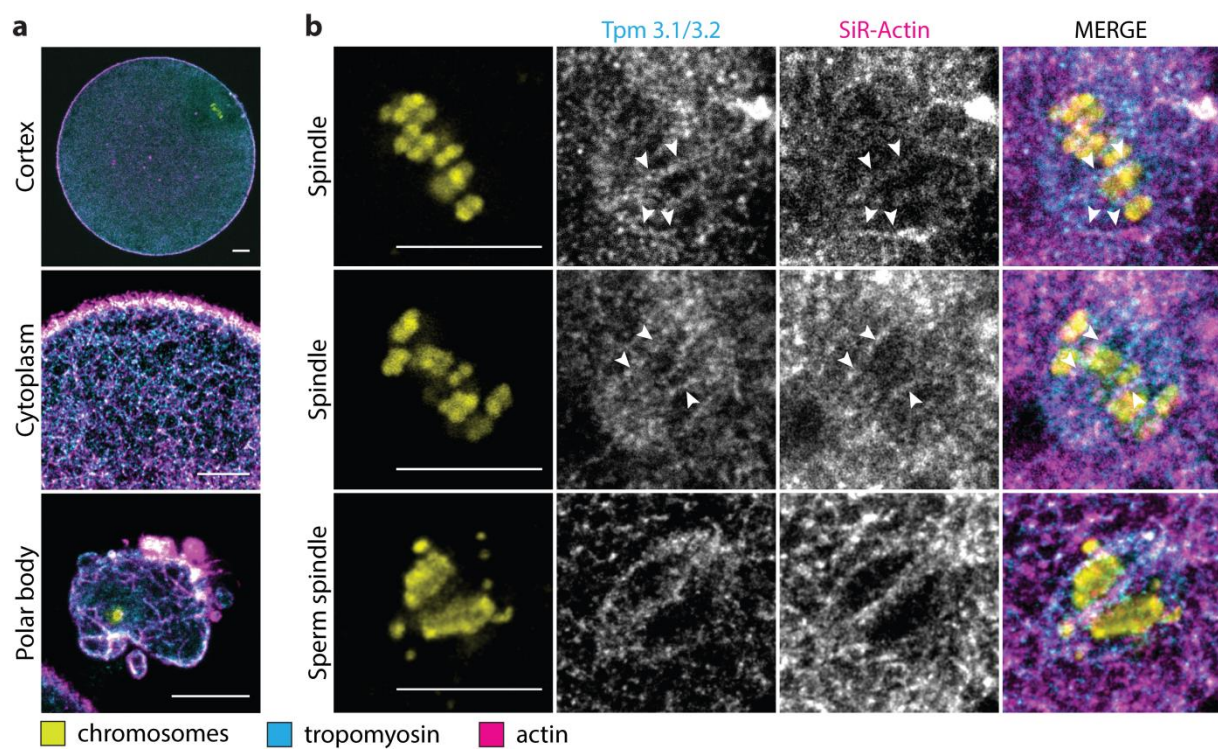

**Supplementary Fig. 4** Spindle actin is associated with tropomyosins in human oocytes. **a**, Representative images showing tropomyosin Tpm3.1/3.2 and actin (SiR-actin) together with chromosomes (Hoechst) at the cortex, cytoplasm and polar body of metaphase II oocytes;  $z = 1, 2$  and 1 sections. **b**, Close-up view of Tpm3.1/3.2 and actin (SiR-actin) at spindles surrounding maternal and paternal (sperm) chromatin in ICSI treated oocytes;  $z = 3, 4$  and 3 sections. Arrowheads mark signal overlap at the spindle. Scale bars, 10  $\mu\text{m}$ .

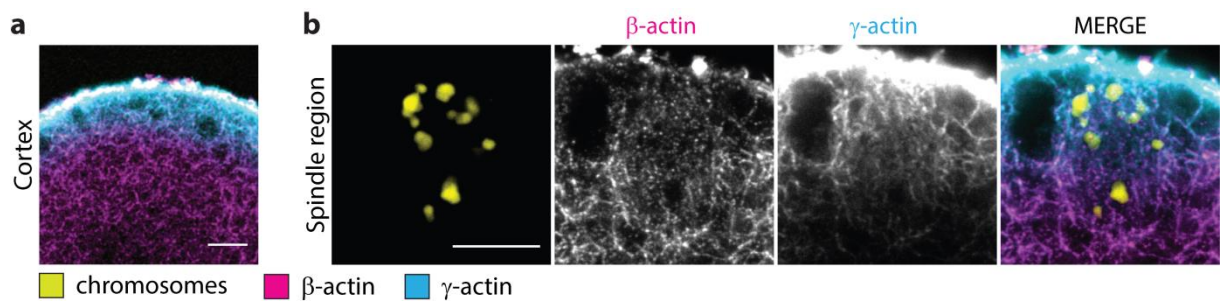

**Supplementary Fig. 5** Different specific actin isoforms meet in the vicinity of the meiotic spindle. **a** and **b**, Total view and spindle close-up of metaphase II oocytes stained for chromosomes (Hoechst),  $\beta$ -actin and  $\gamma$ -actin;  $z = 1$  and  $9$  sections. Scale bars,  $10 \mu\text{m}$ .



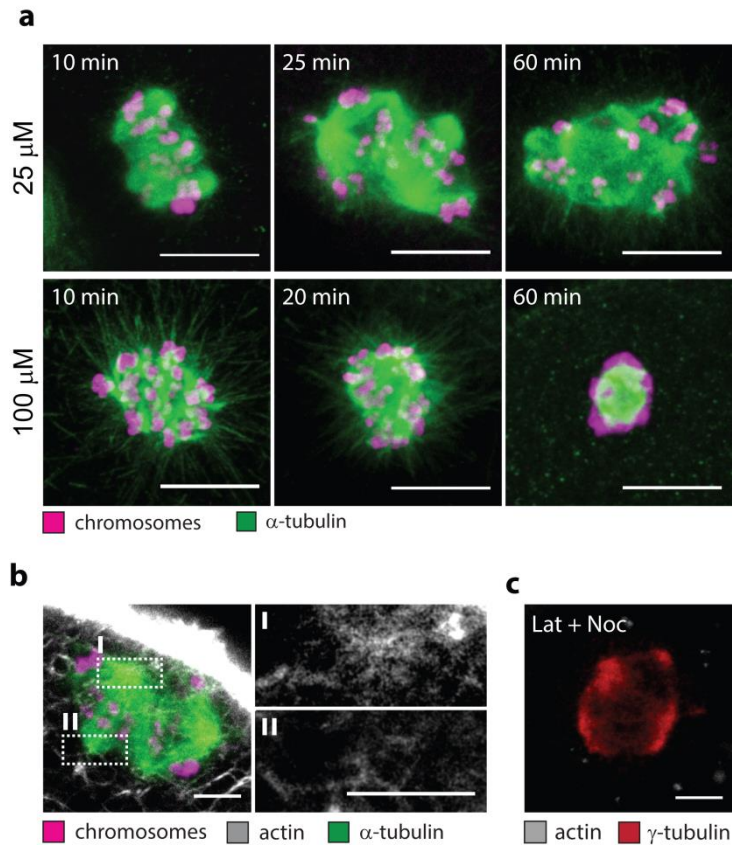

**Supplementary Fig. 6** Microtubule decomposition by nocodazole affects spindle actin organization.

**a**, Immunofluorescence projections exemplifying chromosome and microtubule arrangement in nocodazole-treated oocytes.  $z = 11$  sections. Scale bars, 10  $\mu$ m. **b**, Close-up view of actin accumulations (phalloidin) at different multipoles of a nocodazole-treated oocyte stained for chromosomes (Hoechst), actin (phalloidin) and  $\alpha$ -tubulin;  $z = 4$  sections. Scale bars, 5  $\mu$ m. **c**, Representative image of an oocyte treated with latrunculin-B and subsequently incubated in both latrunculin-B and nocodazole showing actin (phalloidin) and  $\gamma$ -tubulin;  $z = 5$  sections. Scale bar, 5  $\mu$ m.

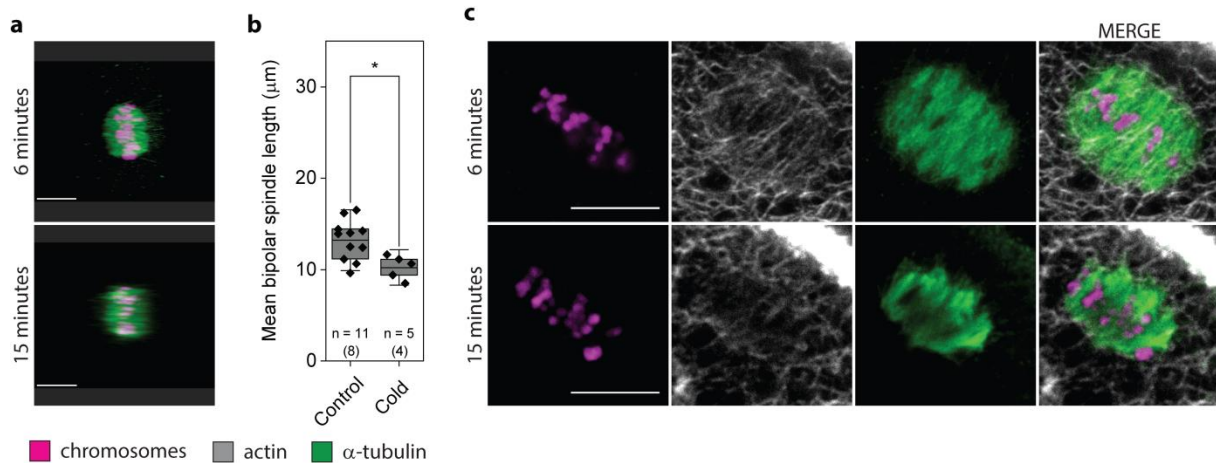

**Supplementary Fig. 7** Microtubule decomposition by cold affects spindle actin organization. **a**, 3D snapshots of chromosomes (Hoechst) and microtubules ( $\alpha$ -tubulin) exemplifying short spindles with broad poles in cold-treated oocytes. Scale bars, 10  $\mu\text{m}$ . **b**, Mean length of bipolar spindles in untreated MII oocytes and oocytes exposed to cold for 6 to 15 minutes. Control measurements are equal to those shown in Fig. 3b. **c**, Example z-projections of cold-treated oocytes after 6 and 10 minutes showing chromosomes (Hoechst), actin (phalloidin) and  $\alpha$ -tubulin; z = 3 and 4 sections. Scale bars, 10  $\mu\text{m}$ . n = total number of oocytes. The number of donors is specified within parentheses. Centre lines are mean values; boxes illustrate 25th and 75th percentiles. Error bars represent standard deviation. Significance was tested using the two-tailed two sample t-test. Asterisk denotes p-value: \* < 0.05. Source data are provided as a Source Data file.



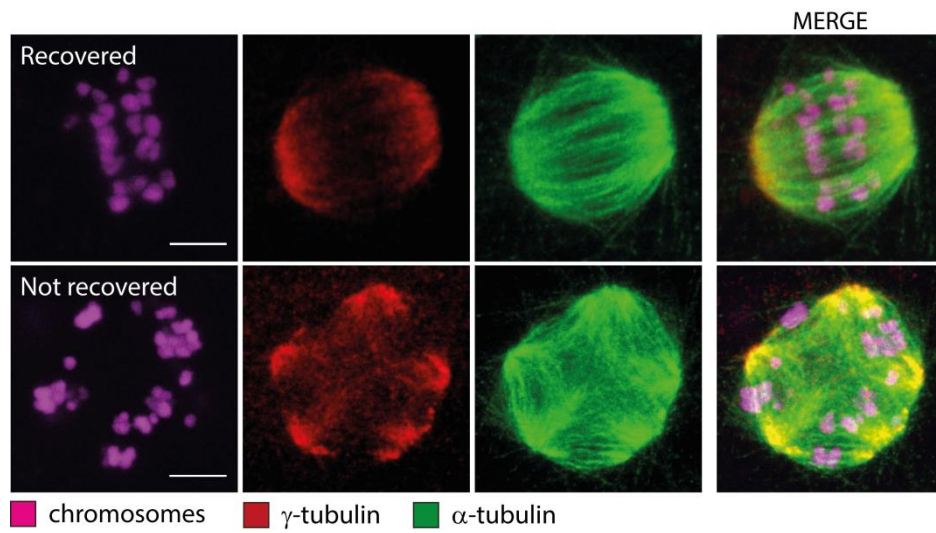

**Supplementary Fig. 8**  $\gamma$ -tubulin shows bipolar distribution in recovered oocytes. Representative z-projections of recovered and not recovered MII oocytes after nocodazole treatment and 60 to 90 minutes regeneration time showing chromosomes (Hoechst),  $\alpha$ -tubulin and  $\gamma$ -tubulin; z = 4 sections. Scale bars, 5  $\mu$ m.
