# Supplementary material for: Actin-microtubule interplay coordinates spindle assembly in human oocytes
Source: PubMed Central journal article supplement (PMC6789129; doi:10.1038/s41467-019-12674-9), 2019-10-11
Supplement: 41467_2019_12674_MOESM3_ESM.pdf [file 41467_2019_12674_MOESM3_ESM.pdf]

## Description of Additional Supplementary Files

### File name: Supplementary Movie 1

**Description: 3D reconstruction of actin filaments within the spindle** | Three-dimensional animation showing original actin signal and filament reconstruction within the spindle of a human metaphase II oocyte stained for chromosomes (Hoechst, magenta) and actin (phalloidin, grey). The z stack contained  $z = 19$  confocal sections, taken every  $0.5 \mu\text{m}$ . Volume reconstruction was performed using Imaris software. Scale bar,  $5 \mu\text{m}$ .

### File name: Supplementary Movie 2

**Description: Microtubules attach to the spindle poles via multiple  $\gamma$ -tubulin foci** | Three-dimensional animation showing microtubules ( $\alpha$ -tubulin, green) and  $\gamma$ -tubulin (red) in a human metaphase II oocyte. The z stack contained  $z = 22$  confocal sections, taken every  $0.5 \mu\text{m}$ . Volume reconstruction was performed using Imaris software. Scale bar,  $10 \mu\text{m}$ .

### File name: Supplementary Movie 3

**Description: Actin filaments within the anaphase I spindle** | Animated z-stack of a human oocyte at anaphase I stained for chromosomes (Hoechst, magenta) and actin (phalloidin, grey) generated with ImageJ software. Confocal sections were taken every  $0.5 \mu\text{m}$ . Scale bar,  $5 \mu\text{m}$ .

### File name: Supplementary Movie 4

**Description: Actin filaments within the telophase I spindle** | Animated z-stack of a human oocyte at telophase I stained for chromosomes (Hoechst, magenta) and actin (phalloidin, grey) generated with ImageJ software. Confocal sections were taken every  $0.5 \mu\text{m}$ . Scale bar,  $5 \mu\text{m}$ .

### File name: Supplementary Movie 5

**Description: Actin filaments within the metaphase II spindle** | Animated z-stack of a human oocyte at metaphase II stained for chromosomes (Hoechst, magenta) and actin (phalloidin, grey) generated with ImageJ software. Confocal sections were taken every  $0.5 \mu\text{m}$ . Scale bar,  $5 \mu\text{m}$ .

### File name: Supplementary Movie 6

**Description: Monastrol leads to loss of bipolar microtubule alignment and causes  $\gamma$ -tubulin defocusing** | Three-dimensional animation showing chromosomes (Hoechst, magenta), microtubules ( $\alpha$ -tubulin, green) and  $\gamma$ -tubulin (red) in a human metaphase II oocyte treated with monastrol. The z stack contained  $z = 21$  confocal sections, taken every  $0.5 \mu\text{m}$ . Volume reconstruction was performed using Imaris software. Scale bar,  $10 \mu\text{m}$ .

### File name: Supplementary Movie 7

**Description: Nocodazole induces spindle multipolarity and splitting of  $\gamma$ -tubulin clusters** | Three-dimensional animation showing chromosomes (Hoechst, magenta), microtubules ( $\alpha$ -tubulin, green) and  $\gamma$ -tubulin (red) in a human metaphase II oocyte treated with nocodazole. The z stack contained  $z = 23$  confocal sections, taken every  $0.5 \mu\text{m}$ . Volume reconstruction was performed using Imaris software. Scale bar,  $10 \mu\text{m}$ .

**File name: Supplementary Movie 8**

**Description: Subsequent treatment with nocodazole and taxol leads to large multipolar spindles** | Three-dimensional animation showing chromosomes (Hoechst, magenta), microtubules ( $\alpha$ -tubulin, green) and  $\gamma$ -tubulin (red) in a human metaphase II oocyte subsequently treated with nocodazole and taxol. The z stack contained z = 46 confocal sections, taken every 0.5  $\mu\text{m}$ . Volume reconstruction was performed using Imaris software. Scale bar, 15  $\mu\text{m}$ .

**File name: Supplementary Movie 9**

**Description: Subsequent treatment with monastrol and taxol leads to large multipolar spindles** | Three-dimensional animation showing chromosomes (Hoechst, magenta), microtubules ( $\alpha$ -tubulin, green) and  $\gamma$ -tubulin (red) in a human metaphase II oocyte subsequently treated with monastrol and taxol. The z stack contained z = 43 confocal sections, taken every 0.5  $\mu\text{m}$ . Volume reconstruction was performed using Imaris software. Scale bar, 15  $\mu\text{m}$ .

**File name: Supplementary Movie 10**

**Description: Actin at the multipoles is preserved after subsequent treatment with monastrol and taxol** | Three-dimensional animation showing chromosomes (Hoechst, magenta), microtubules ( $\alpha$ -tubulin, green),  $\gamma$ -tubulin (red) and actin (phalloidin, grey) at one multipole of a human metaphase II oocyte subsequently treated with monastrol and taxol. The z stack contained z = 12 confocal sections, taken every 0.5  $\mu\text{m}$ . Volume reconstruction was performed using Imaris software. Scale bar, 10  $\mu\text{m}$ .
